# Supplementary material for: Amelioration of high-fat diet-induced obesity and its associated complications by a myricetin derivative-rich fraction from Syzygium malaccense in C57BL/6J mice
Source: Royal Society of Chemistry journal article supplement (doi:10.1039/d1fo00539a), 2021-01-01
Supplement: d1fo00539a1.pdf [file d1fo00539a1.pdf]

**Fig. S1**

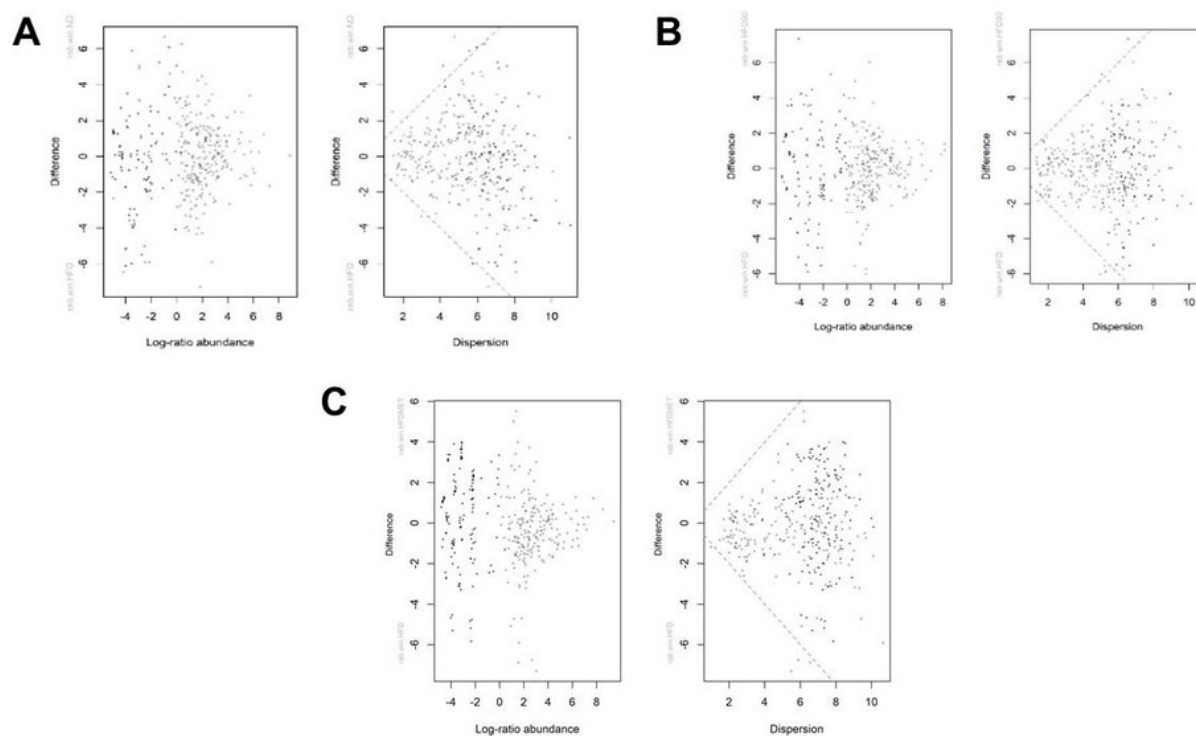

**Fig. S1** The ALDEX2 analysis showed no significant differences in the ASVs abundance between the groups (a) HFD vs ND (b) HFD vs HFD50 (c) HFD vs HFDMET.
