# Supplementary material for: Amelioration of high-fat diet-induced obesity and its associated complications by a myricetin derivative-rich fraction from Syzygium malaccense in C57BL/6J mice
Source: Royal Society of Chemistry journal article supplement (doi:10.1039/d1fo00539a), 2021-01-01
Supplement: d1fo00539a2.pdf [file d1fo00539a2.pdf]

**Table S1** The percentage of organ weight to body weight ratio of mice after 4 weeks of treatment

| <b>Organs</b>          | <b>Groups</b> |                |                  |                  |
|------------------------|---------------|----------------|------------------|------------------|
|                        | <b>ND (%)</b> | <b>HFD (%)</b> | <b>HFD50 (%)</b> | <b>HFDMET(%)</b> |
| Liver                  | 3.70 ± 0.25   | 3.38 ± 0.31    | 3.44 ± 0.30      | 3.38 ± 0.32      |
| Kidney                 | 1.31 ± 0.16   | 1.08 ± 0.05    | 1.07 ± 0.06      | 1.10 ± 0.09      |
| Visceral white adipose | 0.36 ± 0.02*  | 2.28 ± 0.17    | 1.30 ± 0.13*     | 1.48 ± 0.11*     |

Values expressed are means ± S.D (n = 6 per group), \* $p < 0.05$  against the HFD group.
