# Supplementary material for: Amelioration of high-fat diet-induced obesity and its associated complications by a myricetin derivative-rich fraction from Syzygium malaccense in C57BL/6J mice
Source: Royal Society of Chemistry journal article supplement (doi:10.1039/d1fo00539a), 2021-01-01
Supplement: d1fo00539a3.pdf [file d1fo00539a3.pdf]

**Table S2** PERMANOVA analysis of  $\beta$ -diversity matrices.

| <b>Comparison</b> | <b>Df</b> | <b>Sum of squares</b> | <b>F ratio</b> | <b>R2 value</b> | <b>p.value</b> | <b>p.adjusted sig</b> |
|-------------------|-----------|-----------------------|----------------|-----------------|----------------|-----------------------|
| ND vs HFD         | 1         | 1509.775              | 0.9377922      | 0.08573871      | 0.529          | 0.784                 |
| ND vs HFD50       | 1         | 2815.348              | 1.6488772      | 0.14154817      | 0.092          | 0.230                 |
| ND vs HFDMET      | 1         | 1277.368              | 0.7694624      | 0.07144854      | 0.759          | 0.784                 |
| HFD vs HFD50      | 1         | 2668.039              | 1.6530575      | 0.14185612      | 0.073          | 0.230                 |
| HFD vs HFDMET     | 1         | 1146.278              | 0.7316762      | 0.06817912      | 0.784          | 0.784                 |
| HFD50 vs HFDMET   | 1         | 2600.245              | 1.5625008      | 0.13513519      | 0.115          | 0.230                 |

PERMANOVA of the association between bacterial community composition of ND, HFD, HFD50 and HFDMET groups. No significant differences were found between groups ( $p > 0.05$ ). DF: Degree of freedom, F: Pseudo- $F$ -statistic.
